# Supplementary material for: Sexual behaviour among young Danes aged 15–29 years: a cross-sectional study of core indicators
Source: PubMed Central journal article supplement — Sex Transm Infect. 2015 Jan 21;91(3):171–7. doi: 10.1136/sextrans-2014-051814 (PMC4413866; doi:10.1136/sextrans-2014-051814), 2015-01-21
Supplement: sextrans-2014-051814-s1.pdf [file sextrans-2014-051814-s1.pdf]

**English translation of the items included in the present manuscript according to table 1.**

- Have you had your sexual debut – had sex for the first time?  
Yes/no
  
- Do you think of yourself as...
  - Heterosexual (only fancy sex with people of the opposite sex)
  - Homosexual (only fancy sex with people of the same sex as myself)
  - Bisexual (fancy sex with people of both sexes)
  - Do not know
  - Other
  
- Think of the last 12 months. How many sexual partners have you had?
  - None
  - Number of sexual partners \_\_

**The sexual debut**

- The first time you had sex, how old were you?  
\_\_ years
  
- The first time you had sex, how old were your partner?  
\_\_ years
  
- Did you use a condom the first time you had sex?  
Yes/No/Do not remember
  
- Did you or your partner use non-condom contraception the first time you had sex?  
Yes/No/Do not know

### **The last sexual partner**

- Do you have or have had a steady relationship with your last sexual partner?  
Yes/No/Do not know
  
- Did you use a condom the first time you had sex with your last sexual partner?  
Yes/No/Do not remember
  
- Did you or your last sexual partner use non-condom contraception the first time you had sex?  
Yes/No/Do not know

### **Sexually transmitted infections**

- Have you ever been tested for any of the following sexually transmitted infection?
  - Chlamydia
  - Gonorrhoea
  - Syphilis
  - HIV
  
- Have you ever been diagnosed with...  
(please mark with a cross)
  - Chlamydia
  - Gonorrhoea
  - Syphilis
  - HIV

### **Paid sex**

(Some agrees to exchange/give things for sex in terms of clothes, jewelry, mobile phone, cigarettes, drinks or money)

- Have you ever paid or exchanged anything for sex?
  - Yes, several times
  - Yes, one time
  - No never

## **Velkommen til spørgeskemaet om unges SUNDHED & SEX**

**Vi er meget glade for, at du har lyst til at besvare dette spørgeskema.**

**Din besvarelse er helt anonym, og vil sammen med besvarelsen fra andre unge give os en meget vigtig viden for at kunne målrette og øge kvaliteten af de forebyggende indsatser, der har fokus på at bedre den seksuelle sundhed blandt unge i Danmark.**

**Spørgeskemaet, der henvender sig til unge i alderen 15-29 år, tager ca. 25 minutter at besvare. Undervejs vil du blive bedt om at svare på spørgsmål, der handler om sex, selvværd/trivsel, livsstil og baggrundsoplysninger.**

**Hvis du ønsker at holde pause undervejs, vil dine svar automatisk blive gemt. Når du vender tilbage til spørgeskemaet, vil du dog blive nødsaget til selv at bladre frem til det sted, hvor du var kommet til. Husk ALTID at bruge knapperne forrige og næste i stedet for pilene.**

**Som afslutning på din besvarelse, får du mulighed for at vide, hvor stor DIN risiko er for at blive smittet med Klamydia.**

**På forhånd tusind tak for hjælpen!**

**Med venlig hilsen**

**Marianne J. Jørgensen  
Sygepl., MPH, Ph.d.stud.  
Projektkoordinator**

|      |       |    |
|------|-------|----|
| Dato | Måned | År |
|      |       |    |

## Baggrundoplysninger

### Først nogle spørgsmål om dig selv

1. Er du...  Mand  Kvinde

2. Hvor gammel er du?  
(Sæt kryds ved din alder)

|    |    |    |    |    |    |    |    |    |    |    |    |    |    |    |
|----|----|----|----|----|----|----|----|----|----|----|----|----|----|----|
| 15 | 16 | 17 | 18 | 19 | 20 | 21 | 22 | 23 | 24 | 25 | 26 | 27 | 28 | 29 |
|----|----|----|----|----|----|----|----|----|----|----|----|----|----|----|

3. Går du i skole, er du under uddannelse eller laver du noget andet?

- jeg går i skole/er under uddannelse → Gå til spørgsmål 4
- Jeg laver noget andet → Gå til spørgsmål 5, side 212

4. Hvilken skole/uddannelse går du på?

- Grundskole(9.-10. klasse) → Gå til spørgsmål 4.a
- Gymnasial uddannelse(f.eks. alment gymnasium, STX, HF, HHX eller HTX)  
→ Gå til spørgsmål 4.b
- Erhvervsuddannelse (f.eks. teknisk skole, HG, i lære, landbrugsuddannelse osv.)  
→ Gå til spørgsmål 4.c, side 212
- Social og sundhedsskolerne?
- Videregående uddannelse (kort, mellemlang eller lang videregående uddannelse)  
→ Gå til spørgsmål 4.d, side 212
- Andet (f.eks. højskole eller produktionsskole) – skriv hvilken \_\_\_\_\_

a. Hvilken type grundskole går du i?

- Almindelig folkeskole
- Privat skole
- Efterskole
- Andet – skriv hvilken \_\_\_\_\_

b. Hvilken gymnasial uddannelse går du på?

- Alment gymnasium (Stx)
- HF
- Handelsgymnasium (HH/HHX)
- Teknisk gymnasium (HTX)
- Andet – skriv hvilken \_\_\_\_\_

c. Hvilken erhvervsuddannelse går du på?

- Grundforløb på teknisk skole (f.eks. teknologi og kommunikation eller fra jord til bord)
- Grundforløb på handelsskole (f.eks. HG)
- Teknisk skole
- I lære (f.eks. elektriker, murer osv.) eller i skolepraktik på Teknisk skole
- I lære på handelsskole (f.eks. salgsassistent eller dekoratør) eller i skolepraktik på Handelsskole
- Landbrugsuddannelse
- Andet – skriv hvilken \_\_\_\_\_

d. Hvilken type videregående uddannelse går du på?

- Kort videregående uddannelse, under 3 år (f.eks. laborant, markedsføringsøkonom, installatør eller produktionsteknolog)
- Mellemlang videregående uddannelse, 3-4 år (f.eks. sygeplejerske, diplomingeniør, folkeskolelærer, socialrådgiver eller pædagog)
- Lang videregående uddannelse, over 4 år (F.eks. læge, gymnasielærer, civilingeniør eller biolog)

5. Hvad laver du for tiden?

- Erhvervsarbejde
- Arbejdsløs/under aktivering
- Langtidssygemeldt
- Soldat, værnepligtig
- Under revalidering eller lignende
- Går på højskole
- Andet – skriv hvilken \_\_\_\_\_

## Spørgsmål om sex

Følgende spørgsmål handler om seksuel adfærd. Vi ved, at nogen af spørgsmålene kan være svære eller meget personlige at svare på. Derfor skal du vide, at alle svar **bliver behandlet fortroligt og at ingen kan finde frem til, hvem der har svaret** (anonymisering). Du kan derfor svare helt ærligt uden risiko for, at nogen kan spore din besvarelse til dig.

Ved nogle af spørgsmålene bliver du bedt om at angive et bestemt antal (f.eks. antal partnere) eller en bestemt dato (f.eks. dato for, hvornår du havde sex). Hvis det er svært at huske helt præcist, så kom med **dit bedste bud**.

### Definition på sex:

*"Sex kan være mange ting, men i denne sammenhæng menes vaginalt (skede) eller anal (endetarm) samleje. Mundsex og/eller kæleri tæller ikke med. Der er tale om sex, uanset om manden eller kvinden har haft orgasme/udløsning".*

6. Har du haft din seksuelle debut – haft sex for første gang?

- Ja
- Nej → Gå til spørgsmål 69, side 232

7. Opfatter du dig selv som....

- Heteroseksuel (har kun lyst til sex med personer af det modsatte køn)
- Homoseksuel (har kun lyst til sex med personer af samme køn som mig selv) Bisexual (har lyst til sex med personer af begge køn)
- Ved ikke
- Andet

8. Har du nogensinde haft sex med en af samme køn som dig?

- Ja
- Nej

9. Tænk på de **seneste 12 måneder**: Hvor mange forskellige personer har du haft sex med?

- Ingen
- Antal partnere

10. Tænk på de **seneste 3 måneder**: Hvor mange forskellige personer har du haft sex med?

- Ingen
- Antal partnere

11. Tænk på den **seneste måned**: Hvor mange forskellige personer har du haft sex med?

Ingen

Antal partnere

12. Har du i løbet af det sidste år haft flere seksuelle partnere sideløbende med hinanden/indenfor samme tidsperiode?

Ja

Nej

13. Hvor mange seksuelle partner har du haft siden din seksuelle debut?

Svar mulighed: "1" – "50 eller flere"

14. Hvor mange **gange** har du haft sex de **den seneste måned**?

Skriv så nøjagtigt et antal som muligt    gange

15. Er du i et fast forhold?

Ja

Nej → [Gå til spørgsmål 16](#)

15a. Hvor lang tid har I været kærestere?

Mindre end 1 måned

1-3 måneder

4-6 måneder

7 måneder – 1 år

Mellem 1-2 år

Mellem 2-5 år

Mere end 5 år

### Tænk på den første gang du havde sex

Ved nogle af spørgsmålene bliver du bedt om at angive et bestemt antal (f.eks. anta partnere) eller en bestemt dato (f.eks. dato for, hvornår du havde sex). Hvis det er svært at huske helt præcist, så kom med **dit bedste bud**.

16. Hvor gammel var du første gang du havde sex?

år

17. Hvor gammel var den partner, du var sammen med, første gang du havde sex?

år

**18. Hvor mødte du den person, du første gang havde sex med?**

- På et uddannelsessted
- Ved en fritidsaktivitet
- Gennem venner
- Til fest og/eller i byen
- På festival
- Gennem familien
- Via internettet:
  - Datingsider
  - Facebook, twitter eller lignende
  - Chatrooms (f.eks. MSN, Arto eller lignende)
  - Andet \_\_\_\_\_
- På dit arbejde
- På ferie/rejse i udlandet
- Andet \_\_\_\_\_

**19. Første gang du havde sex: Vil du sige....**

- At du havde lyst til at have sex?
- At du skulle overtales til at have sex?
- At du blev presset til at have sex?

**20. Var der alkohol indblandet første gang, du havde sex?**

- Ja, jeg havde drukket alkohol
- Ja, min partner havde drukket alkohol
- Ja, vi havde begge drukket alkohol
- Nej, der var ikke alkohol indblandet

**21. Havde du eller din partner røget hash eller indtaget andre euforiserende stoffer første gang, du havde sex?**

- Ja, jeg havde røget hash eller indtaget andre euforiserende stoffer
- Ja, min partner havde røget hash eller indtaget andre euforiserende stoffer
- Ja, vi havde begge røget hash eller indtaget andre euforiserende stoffer
- Nej, hverken min partner eller jeg havde ikke røget hash eller indtaget andre euforiserende stoffer

**22. Brugte I kondom første gang, du havde sex?**

- Ja → [Gå til spørgsmål 23, side 216](#)
- Nej
- Husker ikke → [Gå til spørgsmål 23, side 216](#)



**22a. Forklar, hvorfor du og din partner ikke brugte kondom første gang, I havde sex?**

(Sæt ét eller flere krydser)

- Jeg tænkte ikke på at bruge kondom
- Jeg havde ikke noget kondom
- Jeg vidste ikke, hvor jeg skulle få et kondom fra
- Jeg synes, det er for flovt/pinligt at købe kondomer
- Jeg vidste ikke, hvordan man bruger et kondom
- Min partner ville ikke bruge et kondom
- Det føles ikke rart at bruge kondom
- Kondomer ødelægger stemningen
- Manglende rejsning ved brug af kondom
- Kondomer går for let i stykker
- Jeg har ikke sex med andre
- Jeg troede ikke, at jeg/hun kunne blive gravid
- Jeg troede ikke, jeg kunne få en kønssygdom (seksuel overført infektion)
- Jeg/min partner brugte p-piller
- Jeg/min partner brugte andre former for prævention
- Andet \_\_\_\_\_

**23. Brugte du eller din partner andre former for prævention, første gang I havde sex?**

- Ja
- Nej → Gå til spørgsmål 24, side 217
- Ved ikke → Gå til spørgsmål 24, side 217

**23a. Hvilken slags prævention brugte du eller din partner?**

(Sæt et eller flere krydser)

|                                                                                           |
|-------------------------------------------------------------------------------------------|
| <input type="checkbox"/> P-piller                                                         |
| <input type="checkbox"/> Minipiller                                                       |
| <input type="checkbox"/> Fortrydelsespiller                                               |
| <input type="checkbox"/> Den metode, hvor manden/drengen trækker sig ud, inden han kommer |
| <input type="checkbox"/> Den metode, hvor du undgår sex på frugtbare dage                 |
| <input type="checkbox"/> P-ring (f.eks. NuvaRing)                                         |
| <input type="checkbox"/> Spiral                                                           |
| <input type="checkbox"/> Pessar                                                           |
| <input type="checkbox"/> Andet _____                                                      |

**Tænk på den seneste person, du har haft sex med i det forgangne år.**

Følgende spørgsmål omhandler forholdet til den seneste person, du har haft sex med. Det kan være en fast partner/kæreste, eller det kan være en person, du ikke har haft et fast forhold til. Du bedes svare, selvom denne person er den samme, som ved din seksuelle debut.

Ved nogle af spørgsmålene bliver du bedt om at angive en bestemt dato. Hvis det er svært at huske helt præcist, så kom med dit bedste bud.

**24. Vil du sige at du har/ har haft et fast forhold til denne person?**

- Ja
- Nej
- Ved ikke

**25. Hvor mødte du denne person?**

- På et uddannelsessted
- Ved en fritidsaktivitet
- Gennem venner
- Til fest og/eller i byen
- På festival
- Gennem familien
- Via internettet:
  - Datingsider
  - Facebook, twitter eller lignende
  - Chatrooms (f.eks. MSN, Arto eller lignende)
- Andet \_\_\_\_\_
- På dit arbejde
- På ferie/rejse i udlandet
- Andet \_\_\_\_\_

**26. Hvornår havde du første gang sex med denne person?**

Skriv så nøjagtigt som muligt. Dag Måned År

|  |  |  |
|--|--|--|
|  |  |  |
|--|--|--|

**27. Var der alkohol indblandet, første gang I havde sex?**

- Ja, jeg var påvirket
- Ja, min partner var påvirket
- Ja, vi var begge påvirkede
- Nej, der var ikke alkohol indblandet

**28. Havde du eller din partner røget hash eller indtaget andre euforiserende stoffer første gang, I havde sex?**

- Ja, jeg havde røget hash eller indtaget andre euforiserende stoffer
- Ja, min partner havde røget hash eller indtaget andre euforiserende stoffer
- Ja, vi havde begge røget hash eller indtaget andre euforiserende stoffer
- Nej, hverken min partner eller jeg havde ikke røget hash eller indtaget andre euforiserende stoffer

**29. Brugte I kondom ved denne lejlighed?**

- Ja → [Gå til spørgsmål 30](#)
- Nej
- Husker ikke → [Gå til spørgsmål 30](#)

**29a. Forklar, hvorfor du og din partner ikke brugte kondom første gang, I havde sex?**

(Sæt ét eller flere krydser)

- Jeg tænkte ikke på at bruge kondom
- Jeg havde ikke noget kondom
- Jeg vidste ikke, hvor jeg skulle få et kondom fra
- Jeg synes, det er for flovt/pinligt at købe kondomer
- Jeg vidste ikke, hvordan man bruger et kondom
- Min partner ville ikke bruge et kondom
- Det føles ikke rart at bruge kondom
- Kondomer ødelægger stemningen
- Manglende rejsning ved brug af kondom
- Kondomer går for let i stykker
- Jeg har ikke sex med andre
- Jeg troede ikke, at jeg/hun kunne blive gravid
- Jeg troede ikke, jeg kunne få en kønssygdom (seksuel overført infektion)
- Jeg/min partner brugte p-piller
- Jeg/min partner brugte andre former for prævention
- Andet \_\_\_\_\_

**30. Brugte du eller din partner andre former for prævention, første gang I havde sex?**

- Ja
- Nej → [Gå til spørgsmål 31, side 219](#)
- Ved ikke → [Gå til spørgsmål 31, side 219](#)

**30a. Hvilken slags prævention brugte du eller din partner?**

(Sæt ét eller flere krydser)

|                          |                                                                  |
|--------------------------|------------------------------------------------------------------|
| <input type="checkbox"/> | P-piller                                                         |
| <input type="checkbox"/> | Minipiller                                                       |
| <input type="checkbox"/> | Fortrydelsepiller                                                |
| <input type="checkbox"/> | Den metode, hvor manden/drengen trækker sig ud, inden han kommer |
| <input type="checkbox"/> | Den metode, hvor du undgår sex på frugtbare dage                 |
| <input type="checkbox"/> | P-ring (f.eks. NuvaRing)                                         |
| <input type="checkbox"/> | Spiral                                                           |
| <input type="checkbox"/> | Pessar                                                           |
| <input type="checkbox"/> | Andet _____                                                      |

**31. Har du haft sex med denne person mere end en gang?**

- Ja
- Nej → Hvis pige: Gå til spørgsmål 36, side 221  
→ Hvis dreng: Gå til spørgsmål 38, side 221

**32. Hvornår har du sidst haft sex med denne person?**

Skriv så nøjagtigt som muligt. Dag Måned År

|  |  |  |
|--|--|--|
|  |  |  |
|--|--|--|

**33. Brugte I kondom ved denne lejlighed?**

- Ja → Gå til spørgsmål 34, side 220
- Nej
- Husker ikke → Gå til spørgsmål 34, side 220

**33a. Forklar, hvorfor du og din partner ikke brugte kondom sidste gang, I havde sex?**

(Sæt ét eller flere krydser)

- Jeg tænkte ikke på at bruge kondom
- Jeg havde ikke noget kondom
- Jeg vidste ikke, hvor jeg skulle få et kondom fra
- Jeg synes, det er for flovt/pinligt at købe kondomer
- Jeg vidste ikke, hvordan man bruger et kondom
- Min partner ville ikke bruge et kondom
- Det føles ikke rart at bruge kondom
- Kondomer ødelægger stemningen
- Manglende rejsning ved brug af kondom
- Kondomer går for let i stykker
- Jeg har ikke sex med andre
- Jeg troede ikke, at jeg/hun kunne blive gravid
- Jeg troede ikke, jeg kunne få en kønssygdom (seksuel overført infektion)
- Jeg/min partner brugte p-piller
- Jeg/min partner brugte andre former for prævention
- Andet \_\_\_\_\_

**34. Brugte du eller din partner andre former for prævention, sidste gang I havde sex?**

- Ja
- Nej → Gå til spørgsmål 35
- Ved ikke → Gå til spørgsmål 35

**34.a Hvilken slags prævention brugte du eller din partner?**

(Sæt ét eller flere krydser)

|                          |                                                                  |
|--------------------------|------------------------------------------------------------------|
| <input type="checkbox"/> | P-piller                                                         |
| <input type="checkbox"/> | Minipiller                                                       |
| <input type="checkbox"/> | Fortrydelsespiller                                               |
| <input type="checkbox"/> | Den metode, hvor manden/drengen trækker sig ud, inden han kommer |
| <input type="checkbox"/> | Den metode, hvor du undgår sex på frugtbare dage                 |
| <input type="checkbox"/> | P-ring (f.eks. NuvaRing)                                         |
| <input type="checkbox"/> | Spiral                                                           |
| <input type="checkbox"/> | Pessar                                                           |
| <input type="checkbox"/> | Andet _____                                                      |

**35. Forventer du at have sex med den pågældende person igen?**

- Ja
- Nej
- Ved ikke

### Til pigerne: Graviditet

36. Har du nogensinde været gravid?
- Antal gange (dropdown 1-10)
  - Nej → Gå til spørgsmål 38
37. Har du nogensinde fået foretaget en provokeret abort?
- Ja, en gang
  - Ja, flere gange
  - Nej

### Kønssygdomme (seksuel overførte infektioner)

38. Vil du lade dig undersøge, hvis du tror, du er smittet med en kønssygdom (seksuel overført infektion)?
- Ja
  - Nej
  - Ved ikke
39. Er du nogensinde blevet testet for en kønssygdom (seksuel overført infektion)?  
- Gælder også rutinetjek hos lægen
- Ja
  - Nej → Gå til spørgsmål 41, side 223
  - Ved ikke → Gå til spørgsmål 41, side 223

40. Hvilken kønssygdom (seksuel overført infektion) er du blevet testet for?  
(Sæt ét eller flere krydser)

|                          |                               |
|--------------------------|-------------------------------|
| <input type="checkbox"/> | Klamydia                      |
| <input type="checkbox"/> | Gonorré                       |
| <input type="checkbox"/> | Syfilis                       |
| <input type="checkbox"/> | Kondylomer (kønsvorter)       |
| <input type="checkbox"/> | Herpes på kønsorganerne       |
| <input type="checkbox"/> | HIV                           |
| <input type="checkbox"/> | Anden seksuel overført sygdom |

Hvis anden: Hvilken \_\_\_\_\_

- 40.a Har en test nogensinde vist, at du var smittet med Klamydia?
- Ja
  - Nej
- 40.b Har en test nogensinde vist, at du var smittet med Gonorré?
- Ja
  - Nej

**40.c** Har en test nogensinde vist, at du var smittet med Syfilis?

- Ja
- Nej

**40.d** Har en test nogensinde vist, at du var smittet med Kondylomer (kønsvorter)?

- Ja
- Nej

**40.e** Har en test nogensinde vist, at du var smittet med Herpes på kønsorgangerne?

- Ja
- Nej

**40.f** Har en test nogensinde vist, at du var smittet med HIV?

- Ja
- Nej

**40.g** Har en test nogensinde vist, at du var smittet med en anden kønssygdom (seksuel overført infektion)?

- Ja....hvilken?
- Nej

### Spørgsmål om tidligere seksuelle partnere

Du har nu svaret på halvdelen af de spørgsmål, der omhandler sex.

I det følgende bliver du bedt om at svare på en række spørgsmål omhandlende den næstsidste og tredje sidste person, du har haft sex med i det forgangne år. Det tager **ca. 8 minutter** at besvare disse spørgsmål.

### Tænk på de seneste personer, du har haft sex med i det forgangne år

Følgende spørgsmål omhandler den næstsidste person, du har haft sex med. Det kan være en fast partner/kæreste, eller det kan være en person, du ikke har haft et fast forhold til.

Ved nogle af spørgsmålene bliver du bedt om at angive en bestemt dato. Hvis det er svært at huske helt præcist, så kom med dit bedste bud.

41. Vil du sige, at du har eller har haft et fast forhold til denne person?

- Ja
- Nej
- Ved ikke

42. Hvor mødte du denne person?

- På et uddannelsessted
- Ved en fritidsaktivitet
- Gennem venner
- Til fest og/eller i byen
- På festival
- Gennem familien
- Via internettet:
  - Datingsider
  - Facebook, twitter eller lignende
  - Chatrooms (f.eks. MSN, Arto eller lignende)
  - Andet \_\_\_\_\_
- På dit arbejde
- På ferie/rejse i udlandet
- Andet \_\_\_\_\_

43. Hvornår havde du første gang sex med denne person?

Skriv så nøjagtigt som muligt. Dag Måned År

|  |  |  |
|--|--|--|
|  |  |  |
|--|--|--|

44. Var der alkohol indblandet, første gang i havde sex?

- Ja, jeg var påvirket
- Ja, min partner var påvirket
- Ja, vi var begge påvirkede
- Nej, der var ikke alkohol indblandet



**45. Havde du eller din partner røget hash eller indtaget andre euforiserende stoffer første gang, I havde sex?**

- Ja, jeg havde røget hash eller indtaget andre euforiserende stoffer
- Ja, min partner havde røget hash eller indtaget andre euforiserende stoffer
- Ja, vi havde begge røget hash eller indtaget andre euforiserende stoffer
- Nej, hverken min partner eller jeg havde ikke røget hash eller indtaget andre euforiserende stoffer

**46. Brugte I kondom ved denne lejlighed?**

- Ja → Gå til spørgsmål 47
- Nej
- Husker ikke → Gå til spørgsmål 47

**46a. Forklar, hvorfor du og din partner ikke brugte kondom første gang, I havde sex?**

(Sæt ét eller flere krydser)

- Jeg tænkte ikke på at bruge kondom
- Jeg havde ikke noget kondom
- Jeg vidste ikke, hvor jeg skulle få et kondom fra
- Jeg synes, det er for flovt/pinligt at købe kondomer
- Jeg vidste ikke, hvordan man bruger et kondom
- Min partner ville ikke bruge et kondom
- Det føles ikke rart at bruge kondom
- Kondomer ødelægger stemningen
- Manglende rejsning ved brug af kondom
- Kondomer går for let i stykker
- Jeg har ikke sex med andre
- Jeg troede ikke, at jeg/hun kunne blive gravid
- Jeg troede ikke, jeg kunne få en kønssygdom (seksuel overført infektion)
- Jeg/min partner brugte p-piller
- Jeg/min partner brugte andre former for prævention
- Andet \_\_\_\_\_

**47. Brugte du eller din partner andre former for prævention, første gang I havde sex?**

- Ja
- Nej → Gå til spørgsmål 48, side 225
- Ved ikke → Gå til spørgsmål 48, side 225

**47a. Hvilken slags prævention brugte du eller din partner?**

(Sæt ét eller flere krydser)

|                          |                                                                  |
|--------------------------|------------------------------------------------------------------|
| <input type="checkbox"/> | P-piller                                                         |
| <input type="checkbox"/> | Minipiller                                                       |
| <input type="checkbox"/> | Fortrydelsespille                                                |
| <input type="checkbox"/> | Den metode, hvor manden/drengen trækker sig ud, inden han kommer |
| <input type="checkbox"/> | Den metode, hvor du undgår sex på frugtbare dage                 |
| <input type="checkbox"/> | P-ring (f.eks. NuvaRing)                                         |
| <input type="checkbox"/> | Spiral                                                           |
| <input type="checkbox"/> | Pessar                                                           |
| <input type="checkbox"/> | Andet _____                                                      |

**48. Har du haft sex med denne person mere end en gang?**

- Ja
- Nej → Gå til spørgsmål 53, side 226

**49. Hvornår har du **sidst** haft sex med denne person?**

Skriv så nøjagtigt som muligt. Dag Måned År

|  |  |  |
|--|--|--|
|  |  |  |
|--|--|--|

**50. Brugte I kondom ved denne lejlighed?**

- Ja → Gå til spørgsmål 51, side 226
- Nej
- Husker ikke → Gå til spørgsmål 51, side 226

**50a. Forklar, hvorfor du og din partner ikke brugte kondom sidste gang, I havde sex?**

(Sæt ét eller flere krydser)

- Jeg tænkte ikke på at bruge kondom
- Jeg havde ikke noget kondom
- Jeg vidste ikke, hvor jeg skulle få et kondom fra
- Jeg synes, det er for flovt/pinligt at købe kondomer
- Jeg vidste ikke, hvordan man bruger et kondom
- Min partner ville ikke bruge et kondom
- Det føles ikke rart at bruge kondom
- Kondomer ødelægger stemningen
- Manglende rejsning ved brug af kondom
- Kondomer går for let i stykker
- Jeg har ikke sex med andre
- Jeg troede ikke, at jeg/hun kunne blive gravid
- Jeg troede ikke, jeg kunne få en kønssygdom (seksuel overført infektion)
- Jeg/min partner brugte p-piller
- Jeg/min partner brugte andre former for prævention
- Andet \_\_\_\_\_

51. Brugte du eller din partner andre former for prævention, sidste gang I havde sex?

- Ja
- Nej → Gå til spørgsmål 52
- Ved ikke → Gå til spørgsmål 52

51a. Hvilken slags prævention brugte du eller din partner?

(Sæt ét eller flere krydser)

|                          |                                                                  |
|--------------------------|------------------------------------------------------------------|
| <input type="checkbox"/> | P-piller                                                         |
| <input type="checkbox"/> | Minipiller                                                       |
| <input type="checkbox"/> | Fortrydelsespille                                                |
| <input type="checkbox"/> | Den "sikre" metode, hvor manden trækker sig ud, inden han kommer |
| <input type="checkbox"/> | "Den naturlige måde", hvor du undgår sex på frugtbare dage       |
| <input type="checkbox"/> | P-ring (f.eks. NuvaRing)                                         |
| <input type="checkbox"/> | Spiral                                                           |
| <input type="checkbox"/> | Pessar                                                           |
| <input type="checkbox"/> | Andet _____                                                      |

52. Forventer du at have sex med den pågældende person igen?

- Ja
- Nej
- Ved ikke

Følgende spørgsmål omhandler den **tredje sidste person**, du har haft sex med. Det kan være en fast partner/kæreste, eller det kan være en person, du ikke har haft et fast forhold til.

53. Vil du sige, at du har eller har haft et fast forhold til denne person?

- Ja
- Nej
- Ved ikke

54. Hvor mødte du denne person?

- På et uddannelsessted
- Ved en fritidsaktivitet
- Gennem venner
- Til fest og/eller i byen
- På festival
- Gennem familien
- Via internettet:
  - Datingsider
  - Facebook, twitter eller lignende
  - Chatrooms (f.eks. MSN, Arto eller lignende)
  - Andet \_\_\_\_\_
- På dit arbejde
- På ferie/rejse i udlandet
- Andet \_\_\_\_\_

55. Hvornår havde du første gang sex med denne person?

Skriv så nøjagtigt som muligt. Dag Måned År

|  |  |  |
|--|--|--|
|  |  |  |
|--|--|--|

56. Var der alkohol indblandet, første gang i havde sex?

- Ja, jeg var påvirket
- Ja, min partner var påvirket
- Ja, vi var begge påvirkede
- Nej, der var ikke alkohol indblandet

57. Har du eller din partner røget hash eller indtaget andre euforiserende stoffer første gang, I havde sex?

- Ja, jeg havde røget hash eller indtaget andre euforiserende stoffer
- Ja, min partner havde røget hash eller indtaget andre euforiserende stoffer
- Ja, vi havde begge røget hash eller indtaget andre euforiserende stoffer
- Nej, hverken min partner eller jeg havde ikke røget hash eller indtaget andre euforiserende stoffer

58. Brugte I kondom ved denne lejlighed?

- Ja → Gå til spørgsmål 59
- Nej
- Husker ikke → Gå til spørgsmål 59

58a. Forklar, hvorfor du og din partner ikke brugte kondom første gang, I havde sex?

(Sæt ét eller flere krydser)

- Jeg tænkte ikke på at bruge kondom
- Jeg havde ikke noget kondom
- Jeg vidste ikke, hvor jeg skulle få et kondom fra
- Jeg synes, det er for flovt/pinligt at købe kondomer
- Jeg vidste ikke, hvordan man bruger et kondom
- Min partner ville ikke bruge et kondom
- Det føles ikke rart at bruge kondom
- Kondomer ødelægger stemningen
- Manglende rejsning ved brug af kondom
- Kondomer går for let i stykker
- Jeg har ikke sex med andre
- Jeg troede ikke, at jeg/hun kunne blive gravid
- Jeg troede ikke, jeg kunne få en kønssygdom (seksuel overført infektion)
- Jeg/min partner brugte p-piller
- Jeg/min partner brugte andre former for prævention
- Andet \_\_\_\_\_

59. Brugte du eller din partner andre former for prævention, første gang I havde sex?

- Ja
- Nej → Gå til spørgsmål 60, side 228
- Ved ikke → Gå til spørgsmål 60, side 228

**59a. Hvilken slags prævention brugte du eller din partner?**

(Sæt ét eller flere krydser)

|                          |                                                                  |
|--------------------------|------------------------------------------------------------------|
| <input type="checkbox"/> | P-piller                                                         |
| <input type="checkbox"/> | Minipiller                                                       |
| <input type="checkbox"/> | Fortrydelsespille                                                |
| <input type="checkbox"/> | Den "sikre" metode, hvor manden trækker sig ud, inden han kommer |
| <input type="checkbox"/> | "Den naturlige måde", hvor du undgår sex på frugtbare dage       |
| <input type="checkbox"/> | P-ring (f.eks. NuvaRing)                                         |
| <input type="checkbox"/> | Spiral                                                           |
| <input type="checkbox"/> | Pessar                                                           |
| <input type="checkbox"/> | Andet _____                                                      |

**60. Har du haft sex med denne person mere end en gang?**

- Ja  
 Nej → Gå til spørgsmål 65, side 230

**61. Hvornår har du sidst haft sex med denne person?**

Skriv så nøjagtigt som muligt. Dag Måned År

|  |  |  |
|--|--|--|
|  |  |  |
|--|--|--|

**62. Brugte I kondom ved denne lejlighed?**

- Ja → Gå til spørgsmål 63, side 229  
 Nej  
 Husker ikke → Gå til spørgsmål 63, side 229

**62a. Forklar, hvorfor du og din partner ikke brugte kondom sidste gang, I havde sex?**

(Sæt ét eller flere krydser)

- Jeg tænkte ikke på at bruge kondom  
 Jeg havde ikke noget kondom  
 Jeg vidste ikke, hvor jeg skulle få et kondom fra  
 Jeg synes, det er for flovt/pinligt at købe kondomer  
 Jeg vidste ikke, hvordan man bruger et kondom  
 Min partner ville ikke bruge et kondom  
 Det føles ikke rart at bruge kondom  
 Kondomer ødelægger stemningen  
 Manglende rejsning ved brug af kondom  
 Kondomer går for let i stykker  
 Jeg har ikke sex med andre  
 Jeg troede ikke, at jeg/hun kunne blive gravid  
 Jeg troede ikke, jeg kunne få en kønssygdom (seksuel overført infektion)  
 Jeg/min partner brugte p-piller  
 Jeg/min partner brugte andre former for prævention  
 Andet \_\_\_\_\_

63. Brugte du eller din partner andre former for prævention, sidste gang I havde sex?

- Ja
- Nej → [Gå til spørgsmål 64](#)
- Ved ikke → [Gå til spørgsmål 64](#)

63a. Hvilken slags prævention brugte du eller din partner?

(Sæt ét eller flere krydser)

|                          |                                                                  |
|--------------------------|------------------------------------------------------------------|
| <input type="checkbox"/> | P-piller                                                         |
| <input type="checkbox"/> | Minipiller                                                       |
| <input type="checkbox"/> | Fortrydelsespille                                                |
| <input type="checkbox"/> | Den "sikre" metode, hvor manden trækker sig ud, inden han kommer |
| <input type="checkbox"/> | "Den naturlige måde", hvor du undgår sex på frugtbare dage       |
| <input type="checkbox"/> | P-ring (f.eks. NuvaRing)                                         |
| <input type="checkbox"/> | Spiral                                                           |
| <input type="checkbox"/> | Pessar                                                           |
| <input type="checkbox"/> | Andet _____                                                      |

64. Forventer du at have sex med den pågældende person igen?

- Ja
- Nej
- Ved ikke

## Kondombrug.

*Forestil dig en situation, hvor du som udgangspunkt vil bruge kondom ved sex.*

**65. Hvor sikker er du på, at du vil bruge kondom sammen med din faste partner...**

(Sæt ét kryds ved hver linje)

|                                                                                                      | Slet ikke<br>sikker | Ikke særlig<br>sikker | Nogenlunde<br>sikker | Meget<br>Sikker | Fuldstændig<br>Sikker |
|------------------------------------------------------------------------------------------------------|---------------------|-----------------------|----------------------|-----------------|-----------------------|
| 1. Når du har indtaget alkohol eller andre rusmidler (f.eks. hash, kokain, amfetamin, ecstasy m.m.)? |                     |                       |                      |                 |                       |
| 2. Når du er seksuelt ophidset?                                                                      |                     |                       |                      |                 |                       |
| 3. Når du tror, din partner vil blive irriteret, (hvis du foreslår, i skal bruge kondom)?            |                     |                       |                      |                 |                       |
| 4. Når du eller din partner allerede bruger en anden form for prævention (f.eks. p-piller)?          |                     |                       |                      |                 |                       |
| 5. Når du gerne have at din partner ved, at du tager jeres forhold seriøst?                          |                     |                       |                      |                 |                       |

**66. Hvor sikker er du på, at du vil bruge kondom sammen med en person, du ikke har et fast forhold til?**

(Sæt ét kryds ved hver linje)

|                                                                                                                   | Slet ikke<br>sikker | Ikke særlig<br>sikker | Nogenlunde<br>sikker | Meget<br>Sikker | Fuldstændig<br>Sikker |
|-------------------------------------------------------------------------------------------------------------------|---------------------|-----------------------|----------------------|-----------------|-----------------------|
| 1. Hvis du vurderer, at risikoen for at få en kønssygdom (seksuel overført sygdom) er lille?                      |                     |                       |                      |                 |                       |
| 2. Når du har indtaget alkohol eller andre rusmidler?                                                             |                     |                       |                      |                 |                       |
| 3. Når du er seksuelt ophidset?                                                                                   |                     |                       |                      |                 |                       |
| 4. Når du tror, din seksuelle partner måske bliver irriteret/ked af det, (hvis du foreslår, i skal bruge kondom)? |                     |                       |                      |                 |                       |
| 5. Når du eller din seksuelle partner allerede bruger en anden form for prævention (f.eks. p-piller)?             |                     |                       |                      |                 |                       |

## Sex, der involverer ting eller penge.

*Nogle aftaler at udveksle/give ting i form af tøj, smykker og mobiltelefon eller cigaretter, drinks eller penge for sex.*

**67.** Har du nogensinde betalt eller givet noget for sex?

- Ja, flere gange
- Ja, en enkelt gang
- Nej, aldrig → Gå til spørgsmål 68

**67a.** Hvad har du betalt eller givet for sex?

- Penge – hvor meget \_\_\_\_\_ Kr.
- Tøj
- Smykker
- Cigaretter
- Drinks
- Andet \_\_\_\_\_

**68.** Har du nogensinde fået betaling eller andet for sex?

- Ja, flere gange
- Ja, en enkelt gang
- Nej, aldrig → Gå til spørgsmål 69, side 232

**68a.** Hvad har du fået for sex?

- Penge – hvor meget \_\_\_\_\_ Kr.
- Tøj
- Smykker
- Cigaretter
- Drinks
- Andet \_\_\_\_\_



## Spørgsmål om selvværd/trivsel

Du har nu svaret på de spørgsmål, der omhandler sex.

I det følgende beder vi dig svare på en række spørgsmål omhandlende selvværd/trivsel. Det tager ca. 10 minutter at besvare disse spørgsmål.

69. Hvor mange nære venner har du?

Med nære venner menes: venner som du betror dig til og stoler på.

- Jeg har ingen nære venner
- En
- To
- Tre
- Fire
- Fem
- Seks eller flere

70. Sker det nogensinde, at du er alene, selvom du har mest lyst til at være sammen med andre?

- Ja, ofte
- Ja, engang imellem
- Ja, men sjældent
- Nej, aldrig

71. Har du nogen at tale med, hvis du har problemer og brug for støtte?

- Ja, en person
- Ja, flere personer
- Nej, ingen

72. Hvem taler du især med, når du har problemer?

(Sæt ét eller flere krydser)

- Din mor
- Din stedmor
- Din far
- Din stedfar
- Din søster
- Din bror
- Din kæreste
- Din ægtefælle
- Din ven/dine venner
- En lærer på skolen
- En arbejdskollega
- Andre \_\_\_\_\_

**73. Hvem føler du dig mest knyttet til?**

(Sæt ét eller flere krydser)

- Din mor
- Din stedmor
- Din far
- Din stedfar
- Din søster
- Din bror
- Din kæreste
- Din ægtefælle
- Din ven/dine venner
- En lærer på skolen
- En arbejdskollega
- Andre \_\_\_\_\_

**74. Nedenfor ser du en række udsagn, der handler om, hvordan du generelt har det med dig selv.**

(Sæt ét kryds ved hver linje)

|                                                           | Meget<br>Enig | Enig | Uenig | Meget<br>uenig |
|-----------------------------------------------------------|---------------|------|-------|----------------|
| Jeg føler, jeg er ligeså meget værd som andre             |               |      |       |                |
| Jeg føler, jeg har mange gode egenskaber                  |               |      |       |                |
| Alt i alt er jeg tilbøjelig til at føle mig som en fiasko |               |      |       |                |
| Jeg kan gøre ting ligeså godt som de fleste andre         |               |      |       |                |
| Jeg føler ikke, jeg har meget at være stolt af            |               |      |       |                |
| Jeg har en positiv indstilling til mig selv               |               |      |       |                |
| Alt i alt er jeg tilfreds med mig selv                    |               |      |       |                |
| Jeg ville ønske, jeg havde mere respekt for mig selv      |               |      |       |                |
| Jeg føler mig håbløs indimellem                           |               |      |       |                |
| Indimellem synes jeg slet ikke, jeg er god nok            |               |      |       |                |

## Spørgsmål om livsstil

Følgende spørgsmål handler om kostvaner, motionsvaner, rygning, alkohol og stoffer. Ved nogle af spørgsmålene kan du blive bedt om at angive et bestemt antal (f.eks. antal gange du har drukket alkohol). Hvis det er svært at huske helt præcist, så kom med **dit bedste bud**.

## Spørgsmål om din kost

75. Hvordan vurderer du dine kostvaner?

- Meget sunde
- Sunde
- Nogenlunde sunde
- Usunde
- Meget usunde

76. Hvor tit plejer du at spise eller drikke følgende?

(Sæt ét kryds ved hver linje)

| Antal gange                     | Aldrig | Mindre end 1 gang om ugen | 1 gang om ugen | 2-4 gange om ugen | 5-6 gange om ugen | 1 gang om dagen | 2 gange om dagen | 3 el. flere gange om dagen |
|---------------------------------|--------|---------------------------|----------------|-------------------|-------------------|-----------------|------------------|----------------------------|
| Pommes frites                   |        |                           |                |                   |                   |                 |                  |                            |
| Chips                           |        |                           |                |                   |                   |                 |                  |                            |
| Light sodavand                  |        |                           |                |                   |                   |                 |                  |                            |
| Sukkersødet sodavand            |        |                           |                |                   |                   |                 |                  |                            |
| Slik/chokolade                  |        |                           |                |                   |                   |                 |                  |                            |
| Fast food (f.eks. pizza/burger) |        |                           |                |                   |                   |                 |                  |                            |
| Salat/råkost                    |        |                           |                |                   |                   |                 |                  |                            |
| Frukt                           |        |                           |                |                   |                   |                 |                  |                            |

## Spørgsmål om motion

77. Hvis du ser på det sidste halve år, hvad vil du så sige passer bedst som beskrivelse af dine fysiske aktiviteter i fritiden?

- Jeg træner hårdt og dyrker konkurrenceidræt regelmæssigt og flere gange om ugen (f.eks. konkurrencesvømning, håndbold/fodbold på konkurrenceplan)
- Jeg dyrker motionsidræt eller udfører tungt arbejde mindst 4 timer pr. uge (f.eks. motionsløb, styrketræning, aerobic 1-2 gange ugentligt)
- Jeg går, cykler eller dyrker anden lettere motion mindst 4 timer pr. uge (f.eks. til skole eller arbejde)
- Jeg går, cykler eller dyrker anden lettere motion mindre end 4 timer pr. uge (f.eks. til skole eller arbejde)
- Jeg ser kun fjernsyn, spiller computer, læser eller anden stillesiddende beskæftigelse

78. Hvordan vil du vurdere dit eget udseende?

- Jeg ser ret godt ud
- Jeg ser godt ud
- Jeg ser almindelig ud
- Jeg ser ikke særlig godt ud
- Jeg er grim
- Jeg tænker ikke over mit udseende
- Ved ikke

79. Er der noget ved din krop, du gerne vil ændre?

- Ja
- Nej → [Gå til spørgsmål 81](#)

80. Hvordan kunne du tænke dig at gøre det?

- Ved at ændre mine sundhedsvaner; herunder kost, rygning, alkohol og motion
- Ved at tage slankepiller, proteinpulver eller proteindrik m.v.
- Ved at tage anabolske steroider (muskelopbyggende stoffer) eller lignende.
- Ved hjælp af plastikkirurgi (f.eks. brystoperation, ansigtsløftning, fedtsugning m.v.)
- Jeg tror ikke, det kan ændres
- Andet \_\_\_\_\_

81. Hvor høj er du?

cm

82. Hvor meget vejer du?

kg

## Spørgsmål om rygning

83. Ryger du cigaretter?

- Ja, dagligt
- Ja, indimellem
- Nej → [Gå til spørgsmål 84, side 236](#)

**83a.** Hvor mange cigaretter har du røget i løbet af de sidste 30 dage?

(Sæt ét kryds ved hver linje)

|                                 |
|---------------------------------|
| Ingen overhovedet               |
| Mindre end en cigaret om ugen   |
| Mindre end en cigaret om dagen  |
| 1-5 cigaretter om dagen         |
| 6-10 cigaretter om dagen        |
| 11-20 cigaretter om dagen       |
| Mere end 20 cigaretter om dagen |

## Spørgsmål om alkohol

De følgende spørgsmål handler om *drikke, der indeholder alkohol* (det vil sige øl, vin, spiritus eller alkohol-Sodavand f.eks. Mokai). Hvis det er svært at huske helt præcist, så kom med dit bedste bud.

**84.** Har du nogensinde drukket alkohol?

- Ja  
 Nej → Gå til spørgsmål 85, side 237

**84a.** Hvor mange gange har du drukket noget, der indeholder alkohol?

(Sæt ét kryds ved hver linje)

| Drukket alkohol                | Aldrig | 1-2 gange | 3-5 gange | 6-9 gange | 10-19 gange | 20-39 gange | 40 eller flere gange |
|--------------------------------|--------|-----------|-----------|-----------|-------------|-------------|----------------------|
| I hele dit liv                 |        |           |           |           |             |             |                      |
| Indenfor de seneste 12 måneder |        |           |           |           |             |             |                      |
| Indenfor de seneste 30 dage    |        |           |           |           |             |             |                      |

**84b.** Hvor mange gange har du været fuld af at drikke alkohol.

F.eks. ikke kunnet tale tydeligt, haft svært ved at gå lige, kastet op eller haft svært ved at huske, hvad der var sket?

(Sæt ét kryds ved hver linje)

| Været fuld                     | Aldrig | 1-2 gange | 3-5 gange | 6-9 gange | 10-19 gange | 20-39 gange | 40 eller flere gange |
|--------------------------------|--------|-----------|-----------|-----------|-------------|-------------|----------------------|
| I hele dit liv                 |        |           |           |           |             |             |                      |
| Indenfor de seneste 12 måneder |        |           |           |           |             |             |                      |
| Indenfor de seneste 30 dage    |        |           |           |           |             |             |                      |

## Spørgsmål om stoffer

85. How many times (if any) have you smoked hash (pot or marijuana)?

(Sæt ét kryds ved hver linje)

| Røget hash<br>I hele dit liv      | Aldrig | 1-2 gange | 3-5 gange | 6-9 gange | 10-19 gange | 20-39 gange | 40 eller flere gange |
|-----------------------------------|--------|-----------|-----------|-----------|-------------|-------------|----------------------|
| Indenfor de seneste<br>12 måneder |        |           |           |           |             |             |                      |
| Ndenfor de seneste<br>30 dage     |        |           |           |           |             |             |                      |

86. How many times (if any) have you used one or more of the following substances?

(Sæt ét kryds ved hver linje)

|                                                                    | Aldrig | 1-2 gange | 3-5 gange | 6-9 gange | 10-19 gange | 20-39 gange | 40 eller flere gange |
|--------------------------------------------------------------------|--------|-----------|-----------|-----------|-------------|-------------|----------------------|
| Ecstasy, Amfetamin,<br>Kokain eller andre<br>euforiserende stoffer |        |           |           |           |             |             |                      |

Følgende spørgsmål handler om, hvorvidt du tror nogen af dine venner og/eller eventuelle søskende ryger cigaretter, drikker alkohol eller indtager stoffer.

87. How many of your friends do you think...

(Sæt ét kryds ved hver linje)

|                                                                        | Ingen | Få | Nogle | De fleste | Alle |
|------------------------------------------------------------------------|-------|----|-------|-----------|------|
| Ryger cigarette?                                                       |       |    |       |           |      |
| Drikker alkohol<br>(øl, alkohol-sodavand, vin eller drinks)?           |       |    |       |           |      |
| Drikker sig fulde?                                                     |       |    |       |           |      |
| Ryger hash (pot eller marijuana)?                                      |       |    |       |           |      |
| Tager ecstasy, amfetamin, kokain<br>eller andre euforiserende stoffer? |       |    |       |           |      |

88. Do you have any friends?

- Ja  
 Nej → Gå til spørgsmål 89, side 238

88a. Do any of your friends use substances regularly...

(Sæt ét kryds ved hver linje)

|                                                                     | Ja | Nej | Ved ikke |
|---------------------------------------------------------------------|----|-----|----------|
| Ryger cigarette?                                                    |    |     |          |
| Drikker alkohol<br>(øl, alkohol-sodavand, vin eller drinks)?        |    |     |          |
| Drikker sig fulde?                                                  |    |     |          |
| Ryger hash (pot eller marijuana)?                                   |    |     |          |
| Tager ecstasy, amfetamin, kokain eller andre euforiserende stoffer? |    |     |          |

## Til sidst lidt spørgsmål om dig og din familie

**89. Hvem bor du sammen med?**

(Sæt ét eller flere krydser)

- Mor
- Stedmor
- Far
- Stedfar
- Søskende
- Kæreste/ægtefælle
- Andre, f.eks. i kollektiv, på kollegium, hos venner
- Ingen, jeg bor alene
- Andet \_\_\_\_\_

**90. Hvad er din mors højeste uddannelse?**

- 7 år eller færre års skolegang
- 8-10 års skolegang
- Specialarbejder (f.eks. rengøringsassistent, chauffør, postarbejder eller dagplejemor)
- Lærlingeuddannelse eller anden faglig uddannelse (f.eks. tømreruddannelse, social- og sundhedsudd. eller landbrugsudd.)
- Gymnasial uddannelse (gymnasium, HF eller HH)
- Kort videregående uddannelse, under 3 år (f.eks. laborant, markedsføringsøkonom, installatør eller produktionsteknolog)
- Mellemlang videregående uddannelse, 3-4 år (f.eks. sygeplejerske, diplomingeniør, folkeskolelærer, socialrådgiver eller pædagog)
- Lang videregående uddannelse, over 4 år (F.eks. læge, gymnasialærer, civilingeniør eller biolog)
- Andet – angiv venligst \_\_\_\_\_
- Ved ikke

**91. Hvad er din fars højeste uddannelse?**

- 7 år eller færre års skolegang
- 8-10 års skolegang
- Specialarbejder (f.eks. rengøringsassistent, chauffør, postarbejder eller dagplejemor)
- Lærlingeuddannelse eller anden faglig uddannelse (f.eks. tømreruddannelse, social- og sundhedsudd. eller landbrugsudd.)
- Gymnasial uddannelse (gymnasium, HF eller HH)
- Kort videregående uddannelse, under 3 år (f.eks. laborant, markedsføringsøkonom, installatør eller produktionsteknolog)
- Mellemlang videregående uddannelse, 3-4 år (f.eks. sygeplejerske, diplomingeniør, folkeskolelærer, socialrådgiver eller pædagog)
- Lang videregående uddannelse, over 4 år (F.eks. læge, gymnasialærer, civilingeniør eller biolog)
- Andet – angiv venligst \_\_\_\_\_
- Ved ikke

92. Hvor er du født?

- Danmark
- Andet land – hvilket \_\_\_\_\_

93. Hvor er din mor født?

- Danmark
- Andet land – hvilket \_\_\_\_\_

94. Hvor er din far født?

- Danmark
- Andet land – hvilket \_\_\_\_\_

95. Hvilken religion tilhører du?

- Protestantisk (Medlem af Den Danske Folkekirke)
- Katolsk
- Islam
- Jødisk
- Buddhistsk
- Ikke troende
- Ved ikke
- Anden \_\_\_\_\_

95a. Hvor aktivt troende vil du beskrive dig selv?

- Meget
- Noget
- Lidt
- Slet ikke



**Hvis du har uddybende kommentarer eller oplysninger, er du meget velkommen til at skrive dem i følgende rubrik.**

*(Der er plads til op til 255 ord).*

---

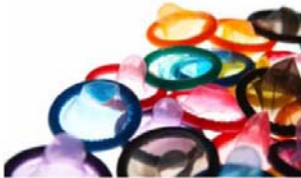

Du er nu færdig med din besvarelse.

Ønsker du at se din sex risiko score klik [her](#)

**Tak for din deltagelse i undersøgelsen.**

**Med venlig hilsen  
Marianne J. Jørgensen**

Sidder du ved en offentlig computer, f.eks. på biblioteket eller i skolen, bør du lukke browseren, så andre ikke kan se din besvarelse.

Undersøgelsen er lavet i samarbejde med:  
Afdeling for Folkeundersøgelser, Region Midtjylland. [www.kraeftscreening.rm.dk](http://www.kraeftscreening.rm.dk)  
Forskningsenheden for Almen Praksis, Aarhus Universitet. [www.alm.au.dk/fe](http://www.alm.au.dk/fe)
