# Supplementary material for: Sexual behaviour among young Danes aged 15–29 years: a cross-sectional study of core indicators
Source: HighWire-hosted journal article supplement (doi:10.1136/sextrans-2014-051814), 2015-01-21
Supplement: sextrans-2014-051814supp_abstract_in_Danish.pdf [file sextrans-2014-051814supp_abstract_in_Danish.pdf]

**Formål:** Seksuelt overførte infektioner og uønskede graviditeter forekommer i stigende grad blandt unge. At forstå den seksuelle adfærd er derfor afgørende både for fremtidig planlægning og implementering af effektive forebyggende interventioner. Nærværende studie undersøger den seksuelle adfærd blandt unge danskere i alderen 15-29 år ved hjælp af nøgleindikatorer anbefalet af ECDC, Det Europæiske Center for Sygdomsforebyggelse og -kontrol.

**Metode:** En landsdækkende tværsnitsundersøgelse blev gennemført i 2012 blandt 20,000 tilfældigt udvalgt unge kvinder og mænd. Respondenterne besvarede et web-baseret spørgeskema om seksuel adfærd, og data blev knyttet til en national demografisk database. Nøgleindikatorerne for seksuel adfærd blev stratificeret på køn og præsenteret som uvægtede samt vægtede data, hvor der blev taget højde for sociodemografiske forskelle mellem respondenter og ikke-respondenter.

**Resultater:** Svarprocenten var på 20,4 %. Ved den seksuelle debut anvendte 69,9 % af kvinderne og 62,3 % af mændene et kondom, mens 14,3 % af kvinderne og 15,1 % af mændene ikke anvendte nogen form for prævention. Halvdelen af de respondenter, der havde sex med en fast partner ved seneste seksuelle samleje anvendte et kondom (kvinder: 51,8 %, mænd: 55,2 %) mens 10 % ikke anvendte nogen form for prævention. Hvis partneren ikke var fast, faldt sandsynligheden for at bruge et kondom (kvinder: 43,7 %, mænd: 49,5 %), mens sandsynligheden for ikke at bruge nogen form for prævention steg (kvinder: 14,8 %, mænd: 20,9 %). Seksuelle adfærds data viste kun mindre ændringer, når vægtet for bortfald.

**Konklusion:** Resultaterne påpeger et behov for nye interventioner, der sætter øget fokus på anvendelse af prævention både ved den seksuelle debut og det seneste samleje; dette synes især vigtigt, når den seksuelle partner ikke er fast.

**Disclaimer:** This abstract has been translated and adapted from the original English-language content. Translated content is provided on an "as is" basis. Translation accuracy or reliability is not guaranteed or implied. BMJ is not responsible for any errors and omissions arising from translation to the fullest extent permitted by law, BMJ shall not incur any liability, including without limitation, liability for damages, arising from the translated text.
